# Supplementary material for: Identification of Metabolic Pathways Essential for Fitness of Salmonella Typhimurium In Vivo
Source: PLOS journal article supplement (doi:10.1371/journal.pone.0101869), 2014-07-03

**Supplementary Figure S4.** The polyamine biosynthesis pathways in *Salmonella*. Putrescine can be formed from arginine through the reactions catalyzed by SpeA and SpeB and from ornithine through the reaction catalyzed by SpeC/SpeF. Spermidine is formed from putrescine through the reactions of SpeE and SpeD.

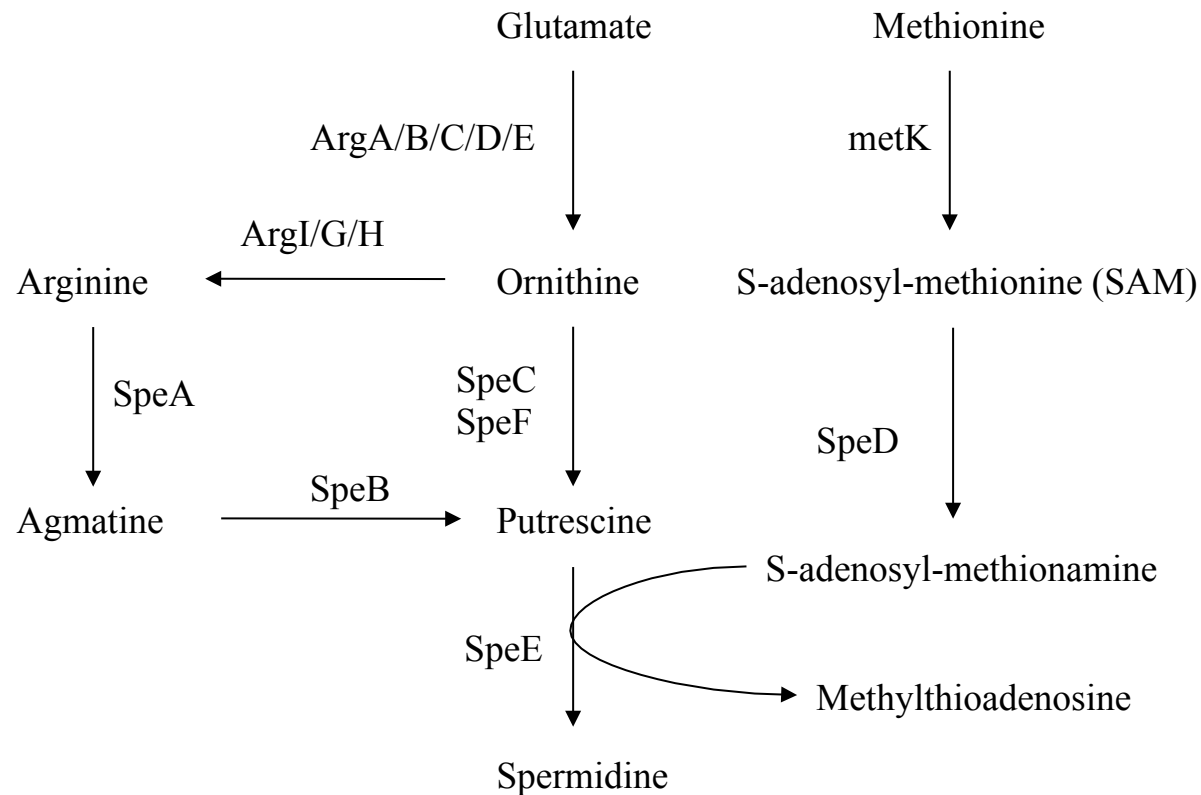

Supplement: S4 (10.1371/journal.pone.0101869.s004) [file journal.pone.0101869.s004]
